# Supplementary material for: Rapid preparation of self-supported nickel–iron oxide as a high-performance glucose sensing platform
Source: Royal Society of Chemistry journal article supplement (doi:10.1039/d2tc03176k), 2022-01-01
Supplement: d2tc03176k1.pdf [file d2tc03176k1.pdf]

## Supporting Information

### Rapid preparation of self-supported nickel-iron oxide as a high-performance glucose sensing platform

Ming Ni,<sup>a,b,†</sup> Minyuan Tan,<sup>b,†</sup> Ying Pan,<sup>c</sup> Chuhong Zhu,<sup>a,\*</sup> and Haiwei Du<sup>a,\*</sup>

<sup>a</sup> *School of Materials Science and Engineering, Anhui University, Hefei 230601, China*

<sup>b</sup> *School of Chemistry and Chemical Engineering, Anhui University, Hefei 230601, China*

<sup>c</sup> *School of Chemical Engineering, The University of New South Wales, NSW 2052, Australia*

Corresponding author emails:

chzhu@ahu.edu.cn (C. Zhu)

haiwei.du@ahu.edu.cn (H. Du)

† These authors contributed equally to this work.

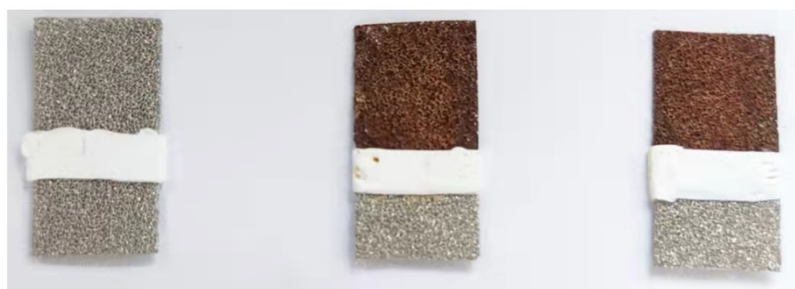

Bare NF

NiFeO<sub>x</sub>-600/NF

NiFeO<sub>x</sub>-800/NF

Figure S1 Photographs of bare NF, NiFeO<sub>x</sub>-600/NF, and NiFeO<sub>x</sub>-800/NF.

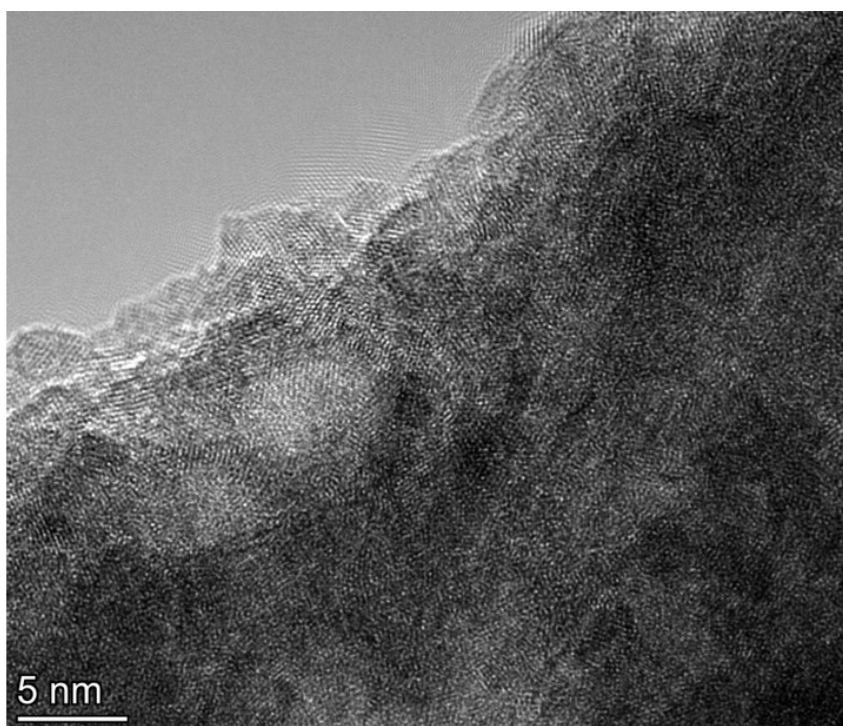

Figure S2 HRTEM image of NiFeO<sub>x</sub>-800 powder sample, which was peeled off from the nickel foam substrate. The lattice fringe corresponds to crystalline domains.

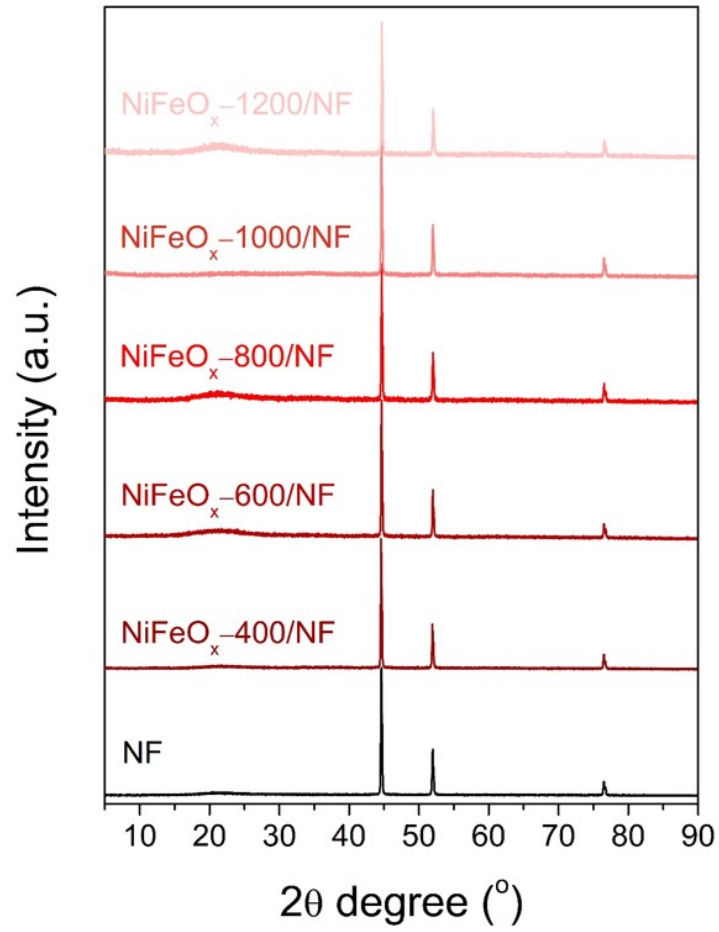

Figure S3 XRD patterns of NiFeO<sub>x</sub>-*t*/NF prepared via different electrodeposition time. Three main peaks are assigned to nickel foam, indicating that NiFeO<sub>x</sub> is amorphous.

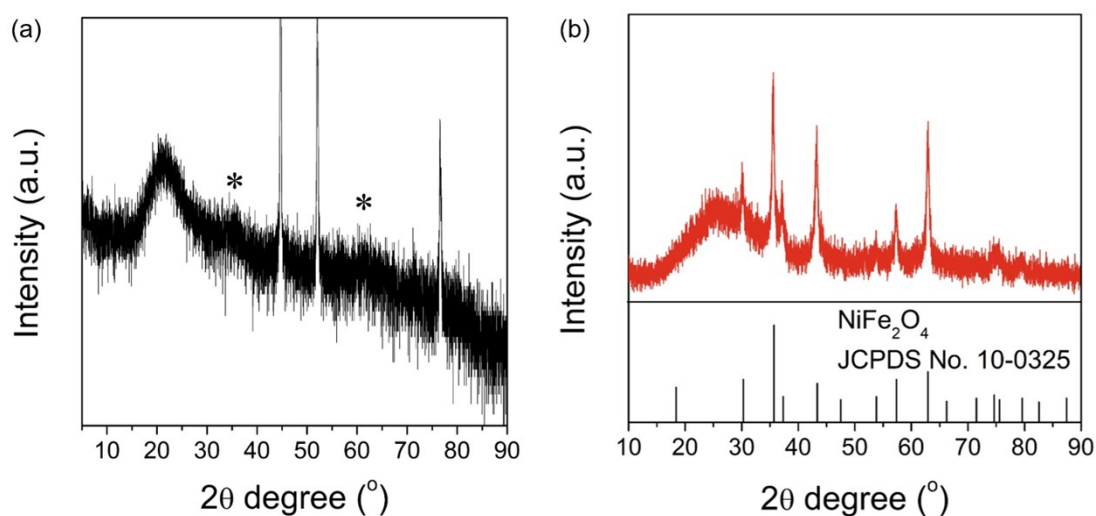

Figure S4 (a) XRD pattern of NiFeO<sub>x</sub>-1200/NF. The Y axis is in logarithmic scale and the crystalline powder is marked by asterisk. (b) NiFeO<sub>x</sub>-800 powder sample after calcination in air at 550 °C for 2.5 h.

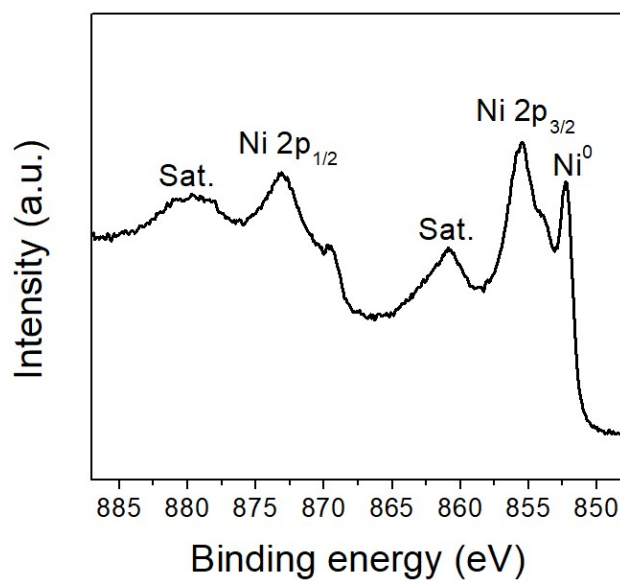

Figure S5 XPS Ni 2p spectrum of NF. The peak at 852.3 eV is indicative of metallic Ni in spite of the presence of slightly oxidized Ni at the surface.

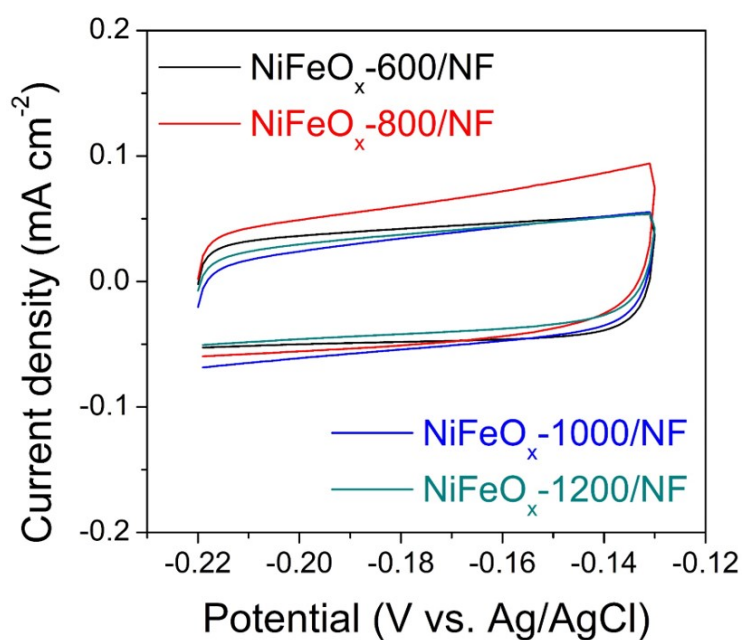

Figure S6 CV curves of NiFeO<sub>x</sub>/NF prepared via different electrodeposition time (electrolyte: 0.1 M KOH; scan rate: 50 mV s<sup>-1</sup>).

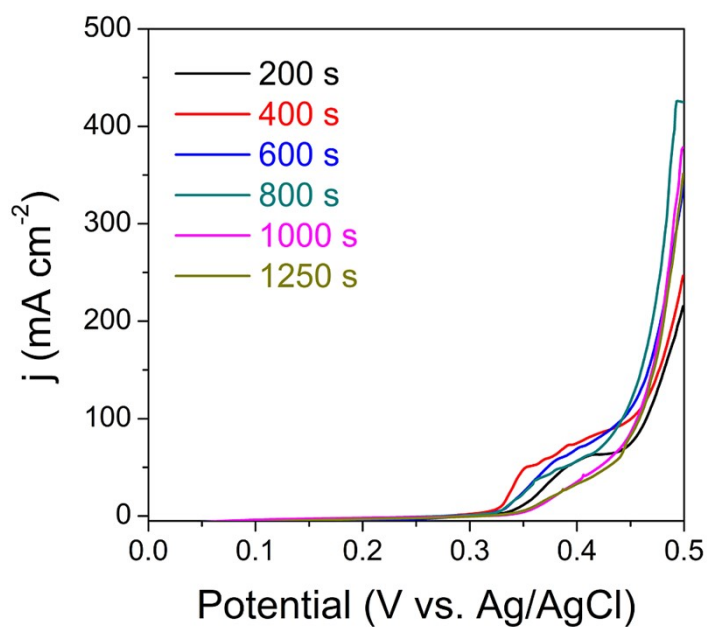

Figure S7 LSV curves NiFeO<sub>x</sub>-t/NF via different electrodeposition time in 1 M KOH at a scan rate of 5 mV s<sup>-1</sup>.

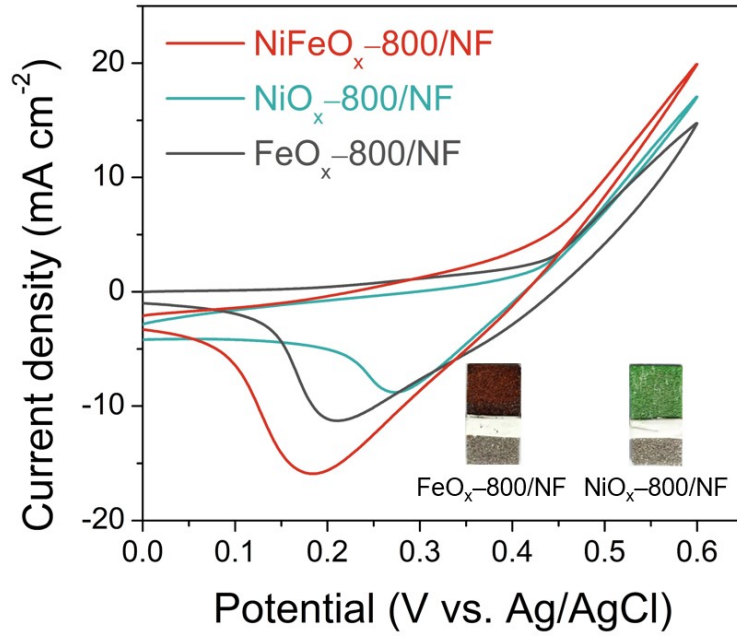

Figure S8 CV curves of  $\text{NiO}_x\text{-800/NF}$ ,  $\text{FeO}_x\text{-800/NF}$  and  $\text{NiFeO}_x\text{-800/NF}$  (electrolyte: 0.1 M KOH; scan rate:  $100 \text{ mV s}^{-1}$ ). Inset: photographs of  $\text{FeO}_x\text{-800/NF}$  and  $\text{NiO}_x\text{-800/NF}$ .

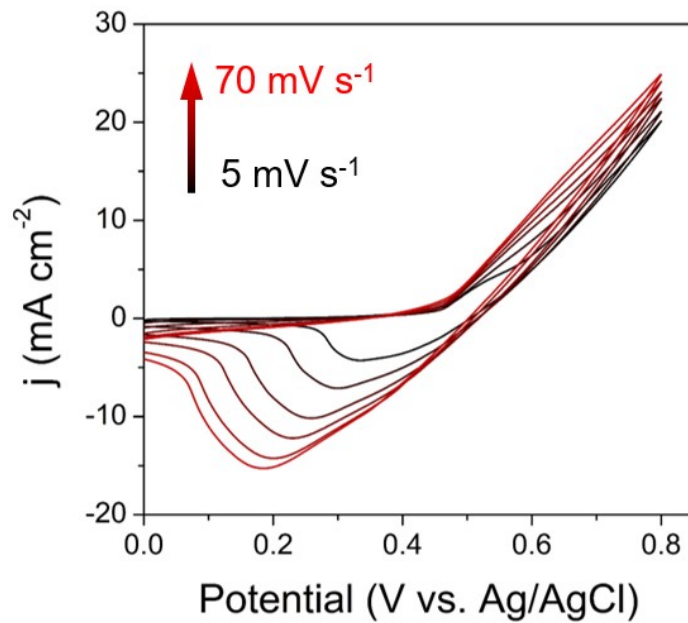

Figure S9 CV curves of  $\text{NiFeO}_x\text{-800/NF}$  in 0.1 M KOH + 3 mM glucose at the scan rates from 5 to  $70 \text{ mV s}^{-1}$ .

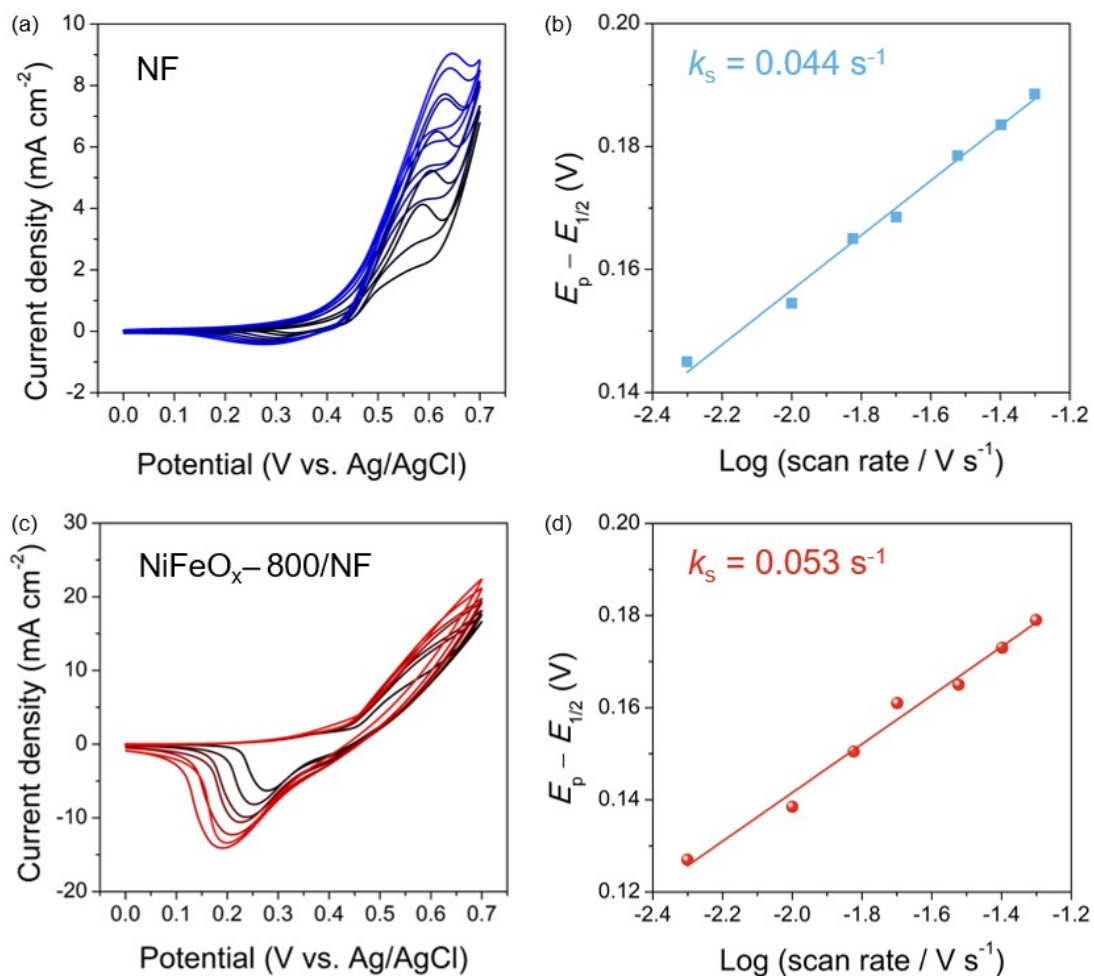

Figure S10 CV curves at the scan rate from 5 to 70 mV s<sup>-1</sup>: (a) NF and (c) NiFeO<sub>x</sub>-800/NF Plot of plot of the redox peak potentials versus the logarithm of scan rates: (b) NF and (d) NiFeO<sub>x</sub>-800/NF.

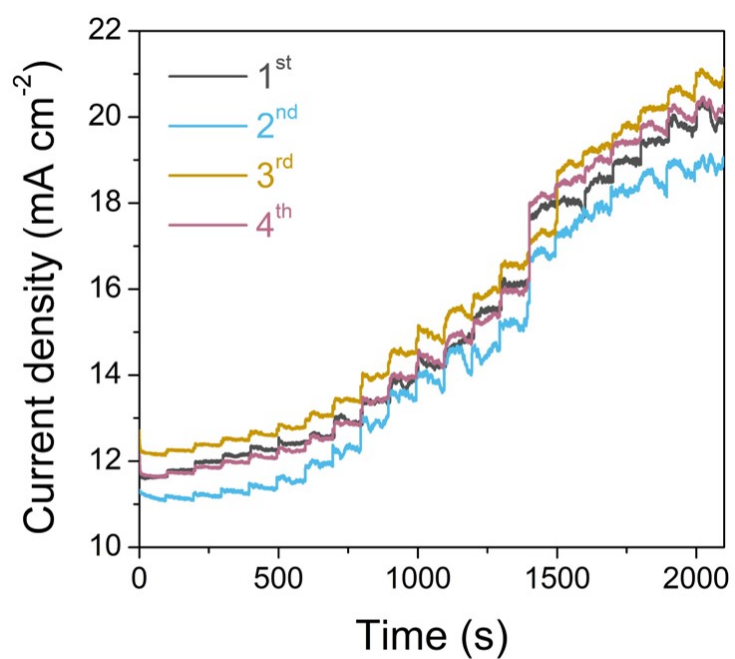

Figure S11 Four  $j-t$  curves of NiFeO<sub>x</sub>-800/NF tested at 0.65 V with continuous addition of glucose in 0.1 M KOH solution.



Table S1 Sensitivity comparison between NiFeO<sub>x</sub>H<sub>y</sub>-800/NF and reported materials.

| Samples                                                              | Sensitivity ( $\mu\text{A mM}^{-1} \text{cm}^{-2}$ ) | Year | Ref.      |
|----------------------------------------------------------------------|------------------------------------------------------|------|-----------|
| Co <sub>2</sub> N <sub>0.67</sub> nanosheets                         | 921.18                                               | 2018 | 1         |
| Co <sub>3</sub> O <sub>4</sub> /CC                                   | 246.8                                                | 2019 | 2         |
| Ni-N-C                                                               | 1181                                                 | 2019 | 3         |
| Co-Ni-Cu alloy thin film                                             | 387                                                  | 2020 | 4         |
| CuO/Ni(OH) <sub>2</sub>                                              | 598.6                                                | 2020 | 5         |
| Cu <sub>2</sub> O nanocubes                                          | 1040                                                 | 2020 | 6         |
| Ni <sub>7</sub> S <sub>6</sub> /CoNi <sub>2</sub> S <sub>4</sub> @CF | 2053                                                 | 2021 | 7         |
| Cu <sub>2</sub> O-Cu-Au                                              | 1082                                                 | 2022 | 8         |
| CoNi HN@GO                                                           | 268                                                  | 2022 | 9         |
| CuNFs/BDD                                                            | 2119                                                 | 2022 | 10        |
| NiFeO <sub>x</sub> -800/NF                                           | 2320                                                 | 2022 | This work |

CC: carbon cloth

CF: carbon fabric

HN: hydroxide nitrate

GO: graphene oxide

CuNFs: Cu nanoflakes

BDD: boron-doped diamond

NF: nickel foam

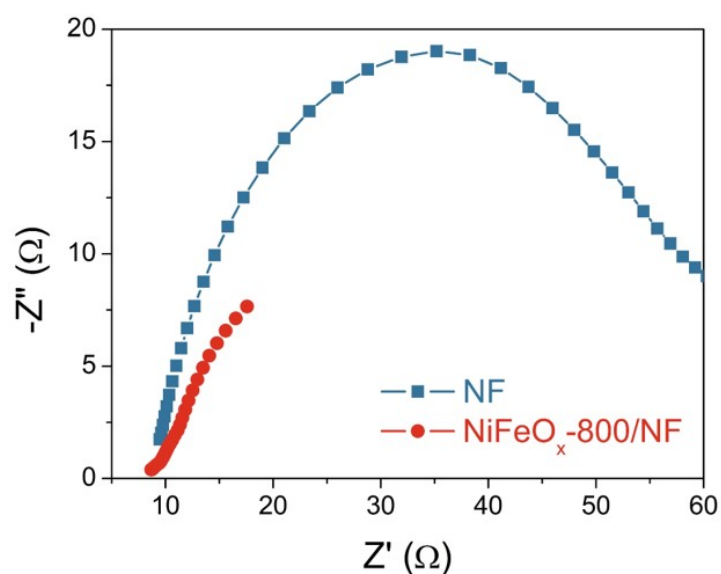

Figure S12 Nyquist plot of NF and NiFeO<sub>x</sub>-800/NF recorded at potential of 0.5 V.

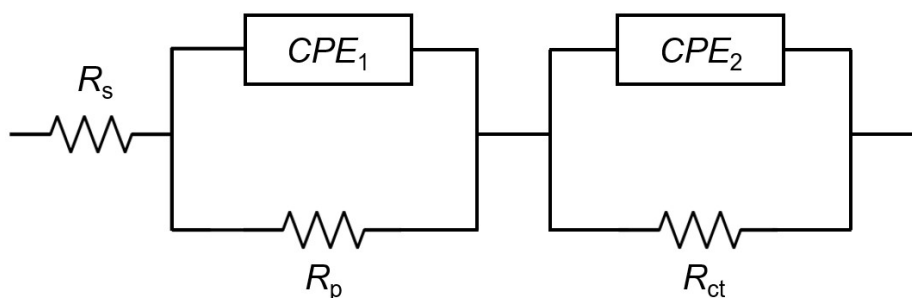

Figure S13 Equivalent circuit model used for EIS data fitting.  $R_s$ ,  $R_p$  and  $R_{ct}$  refer to the solution series resistance, resistance of electrode inner film and charge transfer resistance respectively.  $CPE_1$  and  $CPE_2$  stand for the double-layer capacitance and charge transfer capacitance.<sup>11</sup>

Table S2 EIS fitted results of NF and NiFeO<sub>x</sub>H<sub>y</sub>-800/NF at 0.5 V

| Samples                    | $R_s$ ( $\Omega$ ) | $R_p$ ( $\Omega$ ) | $R_{ct}$ ( $\Omega$ ) |
|----------------------------|--------------------|--------------------|-----------------------|
| NF                         | 8.53               | 39.02              | 29.38                 |
| NiFeO <sub>x</sub> -800/NF | 8.82               | 9.12               | 11.23                 |

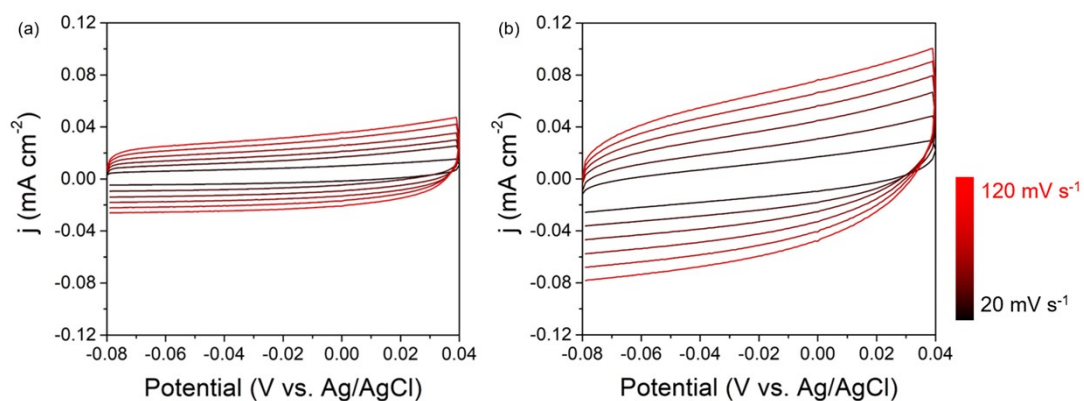

Figure S14 CV curves of NF and NiFeO<sub>x</sub>-800/NF in the non-Faradic potential range. The scan rate increased from 20 to 120 mV s<sup>-1</sup> and the electrolyte was 0.1 M KOH and 3 mM glucose.

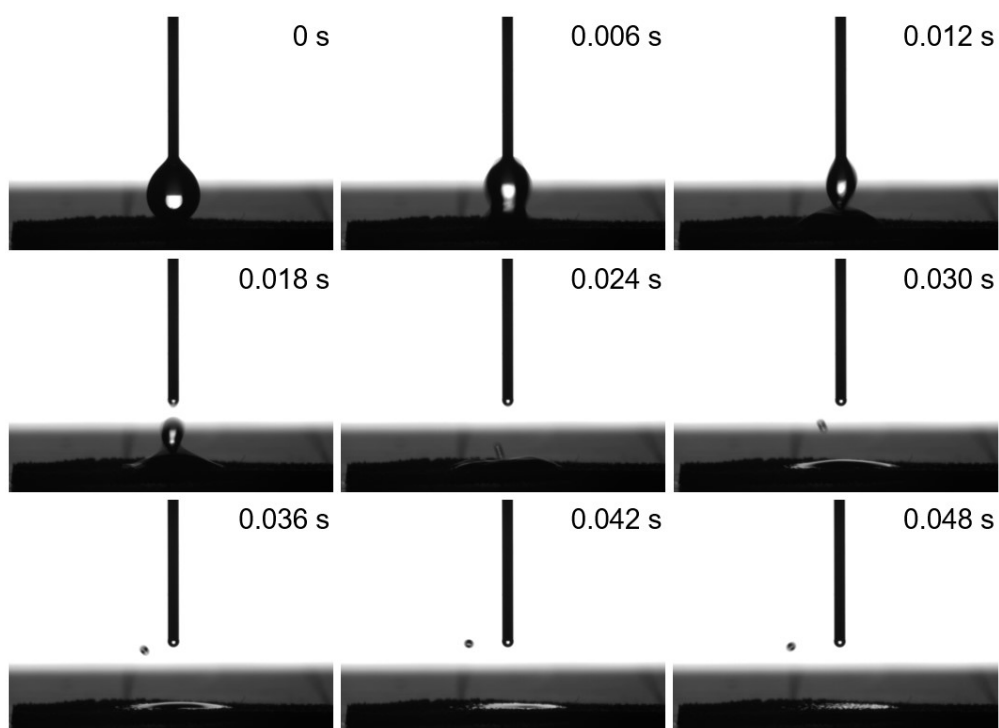

Figure S15 The detailed photographs of water contact angle measurement of NiFeO<sub>x</sub>-800/NF within 0.05 s.

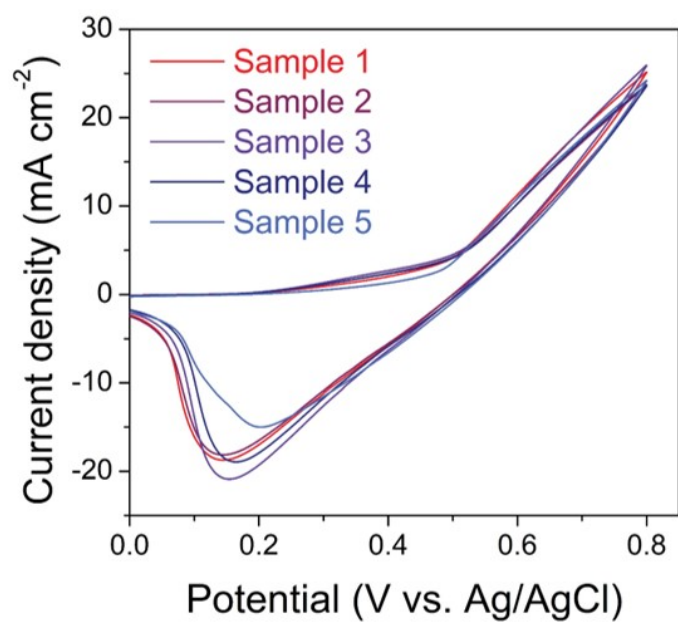

Figure S16 CV curves of five electrodes tested in 0.1 M KOH + 3 mM glucose at a scan rate of 100 mV s<sup>-1</sup>.

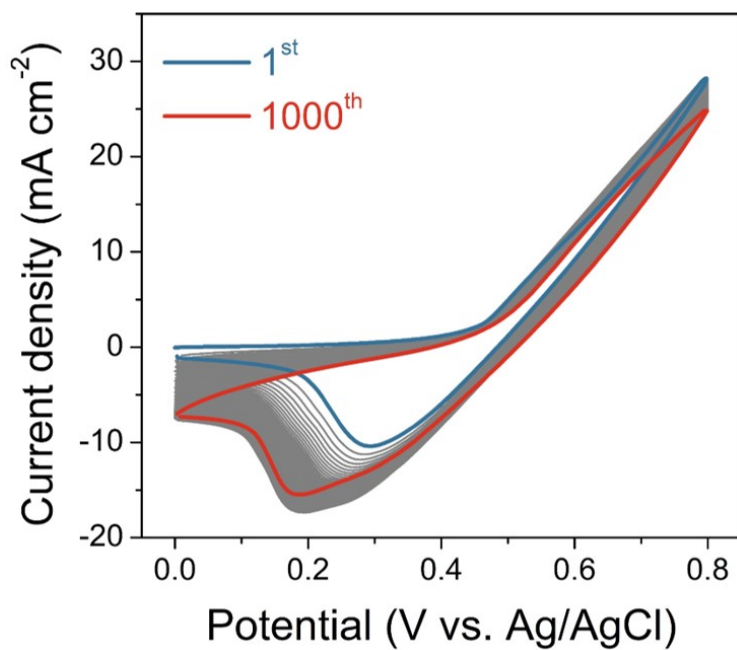

Figure S17 1000 CV curves of NiFeO<sub>x</sub>-800/NF in 0.1 M KOH + 3 mM glucose at a scan rate of 100 mV s<sup>-1</sup>.

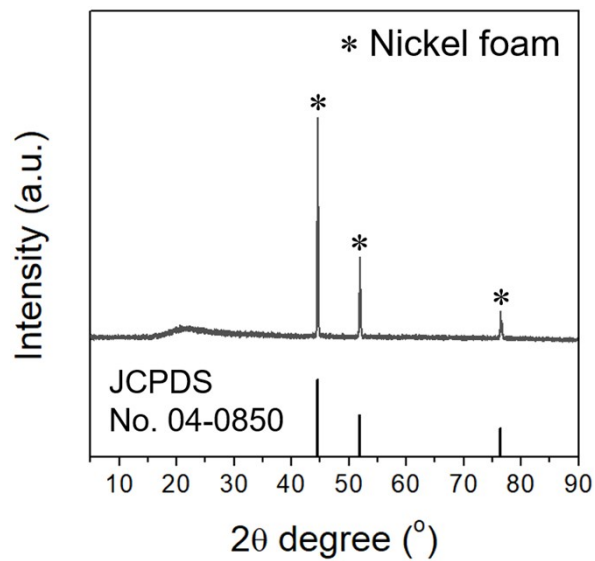

Figure S18 XRD pattern of NiFeO<sub>x</sub>-800/NF after repeated 1000 cycling tests. Only diffraction peaks of nickel foam can be detected.

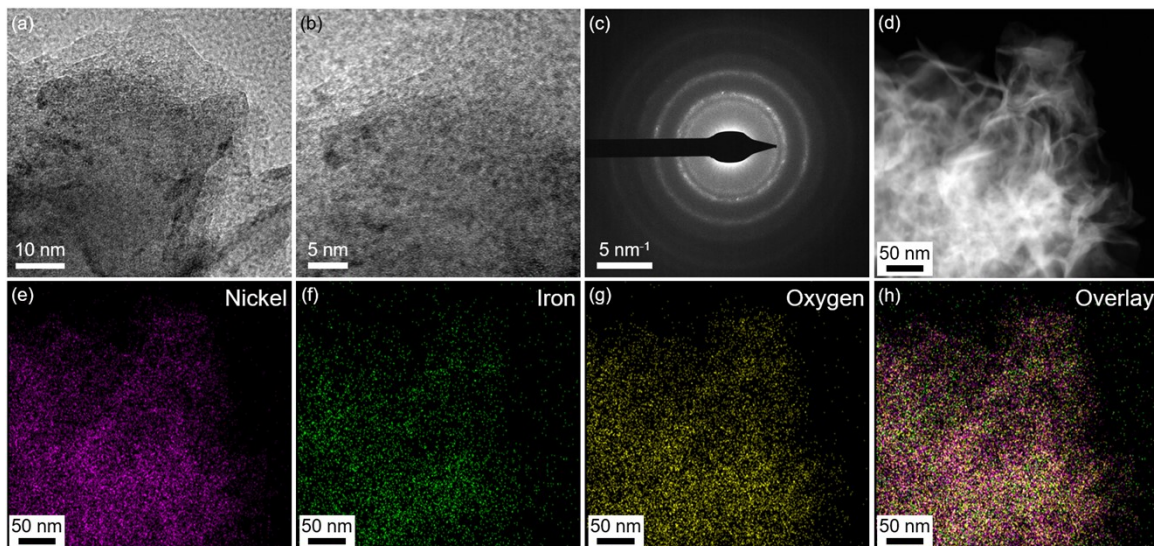

Figure S19 (a, b) TEM images and (c) SAED image of NiFeO<sub>x</sub>-800/NF after repeated 1000 cycling tests. Elemental mapping: (d) dark-field image, (e) nickel, (f) iron, (g) oxygen and (h) overlay.

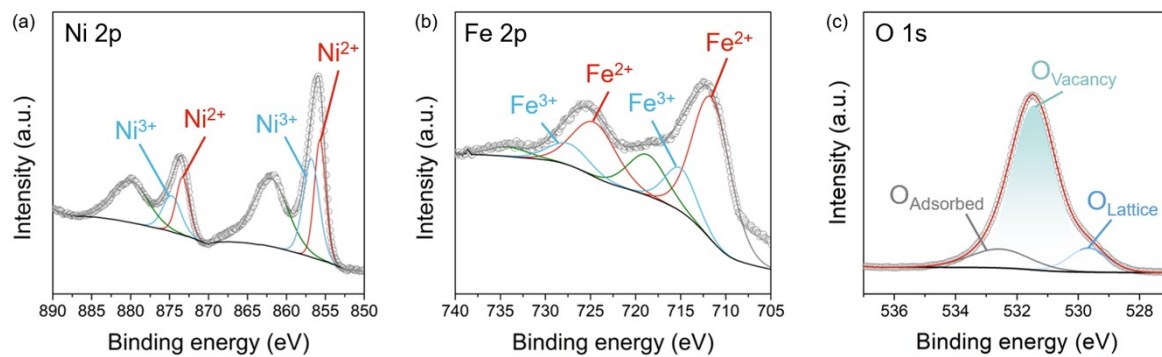

Figure S20 XPS spectra of NiFeO<sub>x</sub>-800/NF after repeated 1000 cycling tests: (a) Ni 2p, (b) Fe 2p and (c) O 1s spectra.

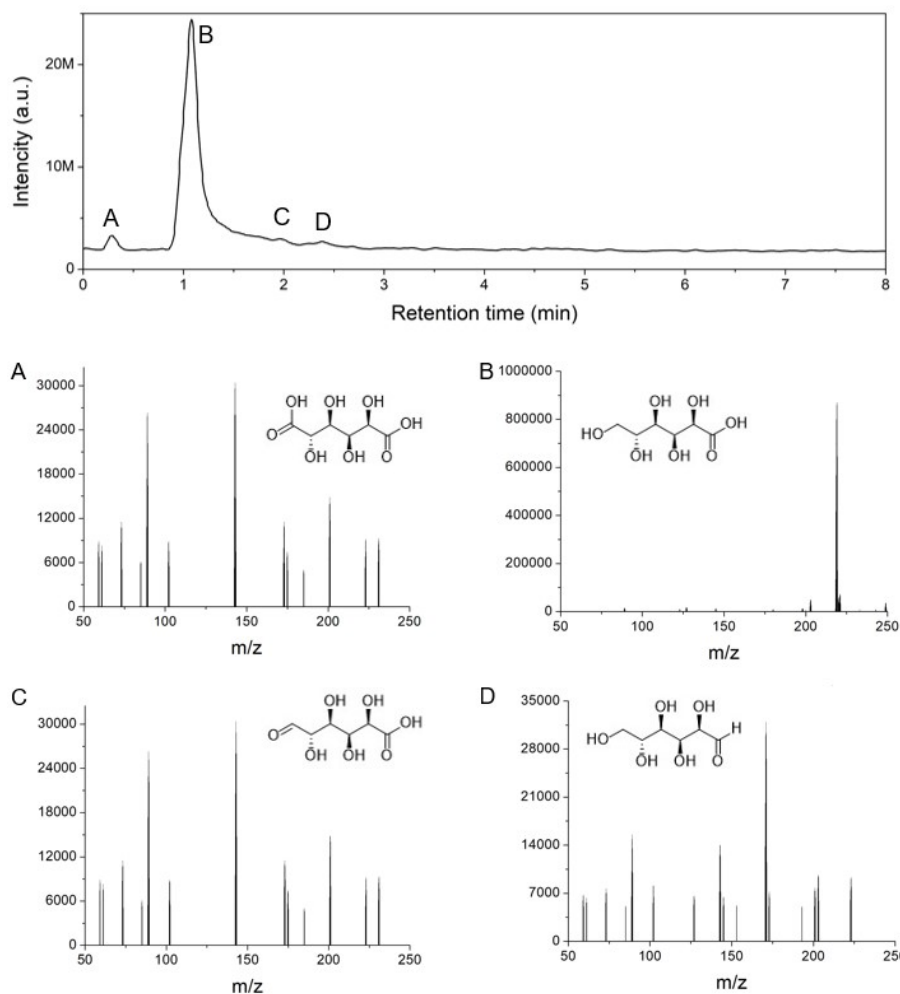

Figure S21 LC-MS analysis of the solution after 1000 glucose sensing CV test (initial glucose concentration: 0.3 M).

Table S3 Analysis of LC-MS results.

|   | Compounds      | Formula        | Molecular mass | Main ion stream          |
|---|----------------|----------------|----------------|--------------------------|
| A | Glucaric acid  | $C_6H_{10}O_8$ | 210            | 200 ( $M+NH_4^++CO$ )    |
| B | Gluconic acid  | $C_6H_{12}O_7$ | 196            | 219 ( $M+Na^+$ )         |
| C | Guluronic acid | $C_6H_{10}O_7$ | 194            | 172 ( $M+Na^+-CO-OH^-$ ) |
| D | Glucose        | $C_6H_{12}O_6$ | 180            | 203 ( $M+Na^+$ )         |

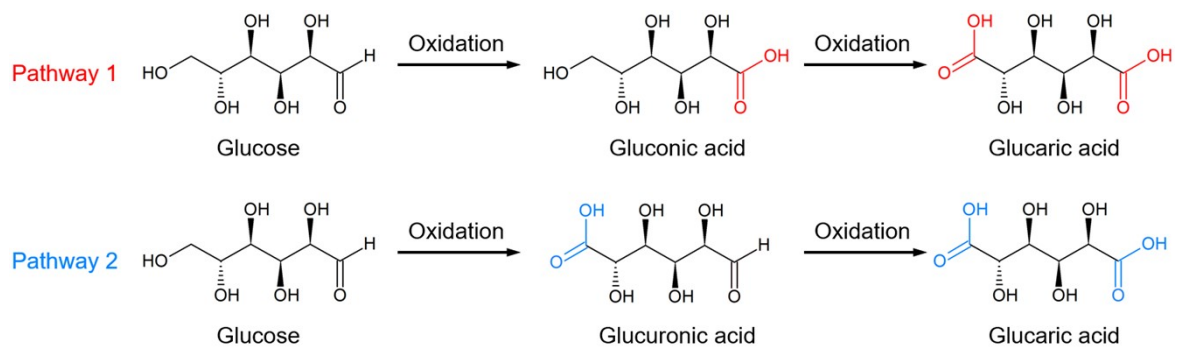

Figure S22 Two possible reaction pathways for glucose oxidation to gluconic acid and glucaric acid.



Table S4 Carbohydrate concentration in commercially available beverages and the corresponding electrochemical current response using NiFeO<sub>x</sub>-800/NF electrode.

| Beverages        | Initial pH value | pH value after injecting into PBS solution | Maximum available concentration (g mL <sup>-1</sup> ) | Average value of current response (mA) at the testing time of 100 s | Error bar |
|------------------|------------------|--------------------------------------------|-------------------------------------------------------|---------------------------------------------------------------------|-----------|
| Lemon juice      | 3.14             | 7.13                                       | 0.130                                                 | 0.051                                                               | 0.0002    |
| Watermelon juice | 3.62             | 7.15                                       | 0.129                                                 | 0.044                                                               | 0.0004    |
| Mixed juice      | 3.63             | 7.16                                       | 0.080                                                 | 0.037                                                               | 0.0024    |
| Grape juice      | 2.90             | 7.14                                       | 0.070                                                 | 0.032                                                               | 0.0006    |
| Milk             | 6.60             | 7.19                                       | 0.047                                                 | 0.022                                                               | 0.0008    |

PBS solution was prepared by mixing 200 mL NaH<sub>2</sub>PO<sub>4</sub> (0.2 mol L<sup>-1</sup>) and 50 mL Na<sub>2</sub>HPO<sub>4</sub> (0.2 mol L<sup>-1</sup>).

The pH value of as-prepared PBS solution is 7.20.

The average value of current response is recorded at the testing time of 100 s when the test is stable.

Table S5 The glucose detection of NiFeO<sub>x</sub>-800/NF in lemon juice.

| Samples | Added (mM) | Detection (mM) | Recovery (%) |
|---------|------------|----------------|--------------|
| 1       | 0.1        | 0.0995         | 99.50        |
| 2       | 0.2        | 0.2009         | 100.49       |
| 3       | 0.3        | 0.3004         | 100.13       |
| 4       | 0.4        | 0.4012         | 100.30       |
| 5       | 0.5        | 0.4980         | 99.60        |
| 6       | 0.6        | 0.6005         | 100.08       |

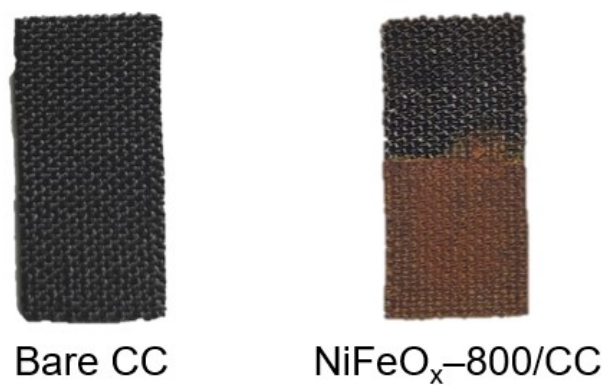

Figure S23 Photographs of bare CC and NiFeO<sub>x</sub>-800/CC.

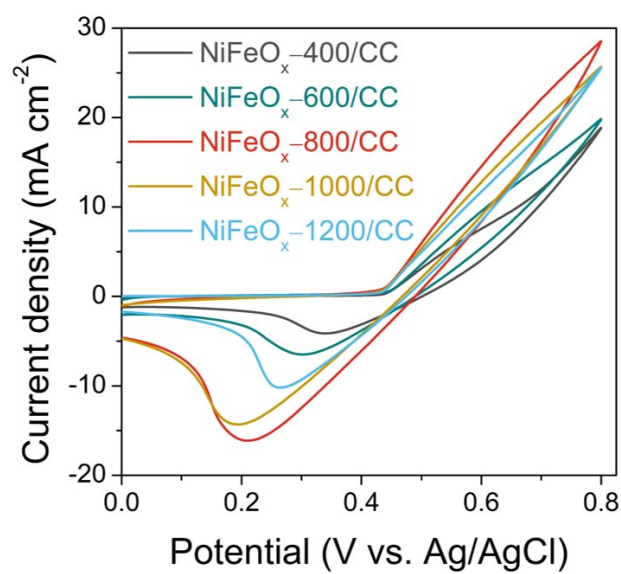

Figure S24 CV curves of NiFeO<sub>x</sub>-*t*/CC in 0.1 M KOH + 3 mM glucose at 100 mV s<sup>-1</sup>. *t* stands for the electrodeposition time.

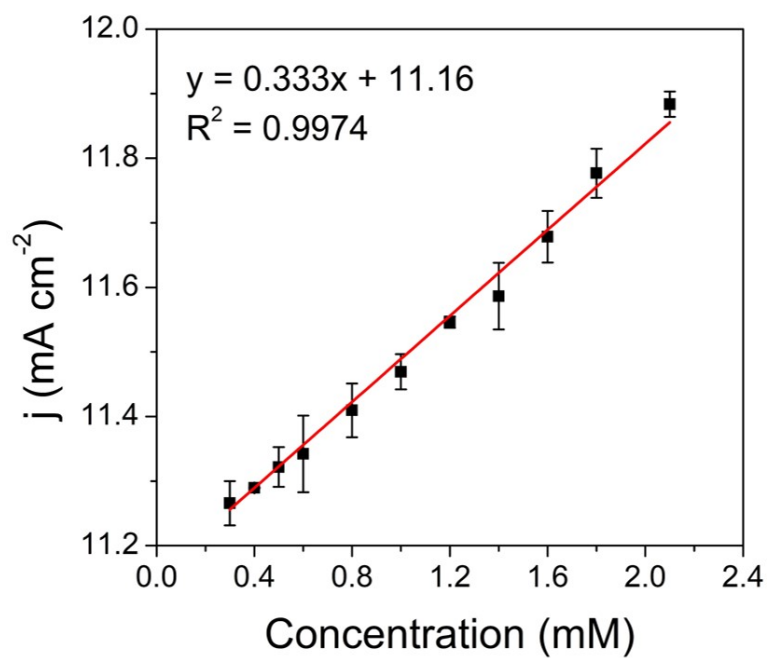

Figure S25 Current density response of NiFeO<sub>x</sub>-800/CC at 0.65 V to the varied glucose concentration.

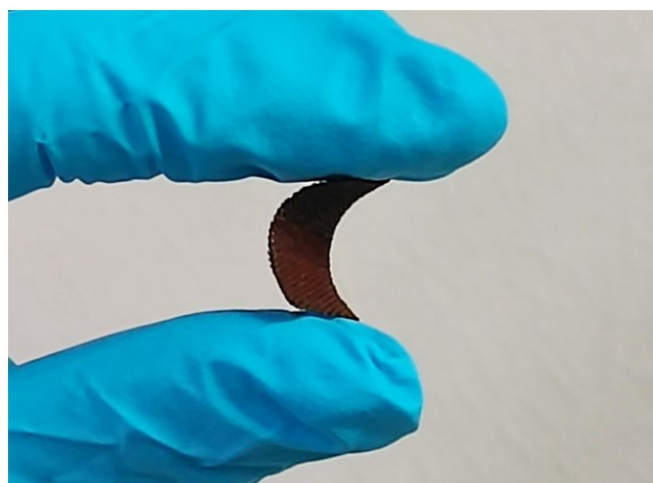

Figure S26 Photographs of NiFeO<sub>x</sub>-800/CC under bent condition.

## References

1. T. Liu, M. Li, P. Dong, Y. Zhang and L. Guo, *Sens. Actuators B: Chem.*, 2018, **255**, 1983-1994.
2. J. Xu, F. Li, D. Wang, M. H. Nawaz, Q. An, D. Han and L. Niu, *Biosens. Bioelectron.*, 2019, **123**, 25-29.
3. X. Chen, X. He, J. Gao, J. Jiang, X. Jiang and C. Wu, *Sens. Actuators B: Chem.*, 2019, **299**, 126945.
4. I. Pötzelberger, C. D. Grill, L. M. Uiberlacker, A. I. Mardare, S. Hild and A. W. Hassel, *Electrochim. Acta*, 2020, **341**, 135744.
5. S. Sun, N. Shi, X. Liao, B. Zhang, G. Yin, Z. Huang, X. Chen and X. Pu, *Appl. Surf. Sci.*, 2020, **529**, 147067.
6. C. Espro, S. Marini, D. Giusi, C. Ampelli and G. Neri, *J. Electroanal. Chem.*, 2020, **873**, 114354.
7. H. Zhao, L. Tang, M. Zhou, K. Li, J. Hu, Y. Zhao and Z. Cai, *J. Mater. Chem. C*, 2022, **10**, 2988-2997.
8. F. Pu, H. Miao, W. Lu, X. Zhang, Z. Yang and C. Kong, *Appl. Surf. Sci.*, 2022, **581**, 152389.
9. S. Gayathri, P. Arunkumar, J. Kim and J. H. Han, *ACS Sustainable Chem. Eng.*, 2022, **10**, 1689-1701.
10. Q. Gao, W. Zhang, C. Zhao, W. Yan, S. Han, Y. Li, Q. Liu, X. Li and D. Liu, *Adv. Mater. Interfaces*, 2022, 2200034.
11. Y. Teng, X. D. Wang, J. F. Liao, W. G. Li, H. Y. Chen, Y. J. Dong and D. B. Kuang, *Adv. Funct. Mater.*, 2018, **28**, 1802463.
